# Supplementary material for: Novel self-assembled amphiphilic mPEGylated starch-deoxycholic acid polymeric micelles with pH-response for anticancer drug delivery
Source: Royal Society of Chemistry journal article supplement (doi:10.1039/c4ra07315k), 2014-10-20
Supplement: c4ra07315k1.pdf [file c4ra07315k1.pdf]

## Supporting Information

### **Novel self-assembled amphiphilic mPEGylated starch-deoxycholic acid polymeric micelles with pH-responsive for anticancer drug delivery**

Jinlong Yang, Chunmei Gao, Shaoyu Lü, Xinggang Wang, Mingjia Chen, Mingzhu Liu\*

State Key Laboratory of Applied Organic Chemistry, Key Laboratory of Nonferrous Metal Chemistry and Resources Utilization of Gansu Province and Department of Chemistry, Lanzhou University, Lanzhou 730000, PR China

---

\* Corresponding author. Tel.: +86-931-8912387; fax: +86-931-8912582

E-mail address: mzliu@lzu.edu.cn

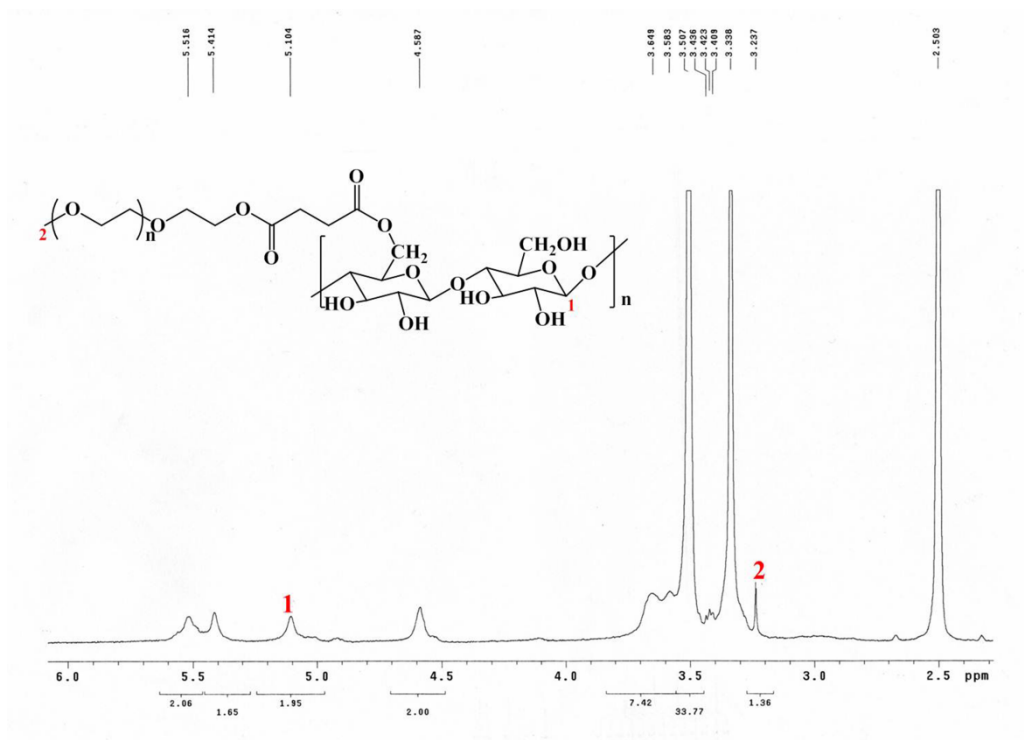

**Fig. S1**  $^1\text{H}$  NMR spectrum of mPEG-St polymer in  $\text{DMSO-d}_6$

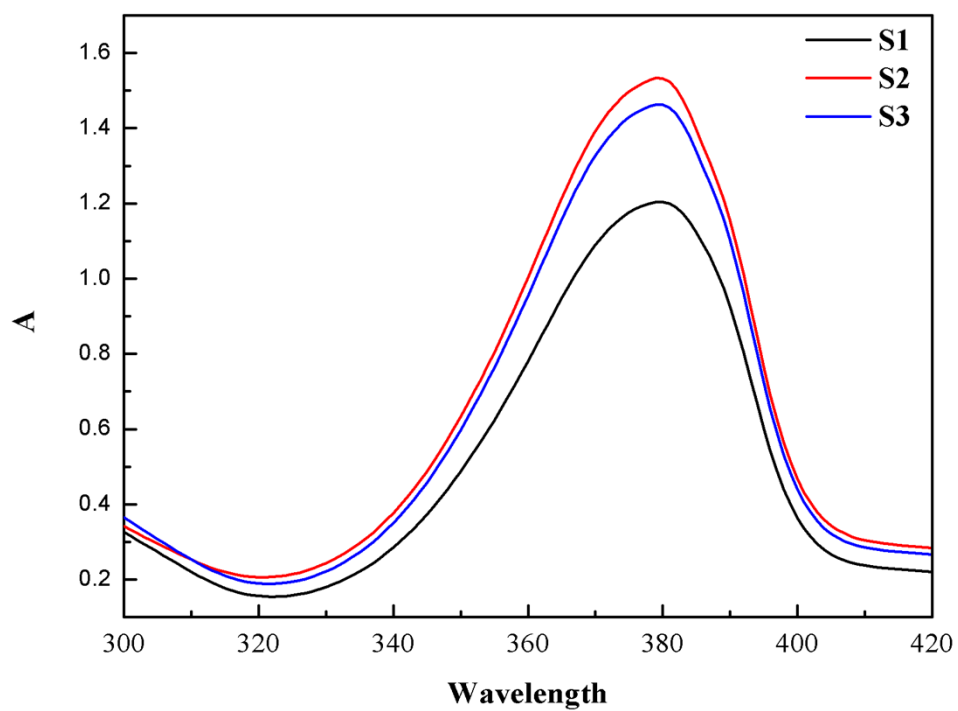

**Fig. S2** The UV scanning spectra of mPEG-St-DCA polymer with different feed ratio of DCA to glucose units of mPEG-St: (S1) 40%, (S2) 50%, and (60%)

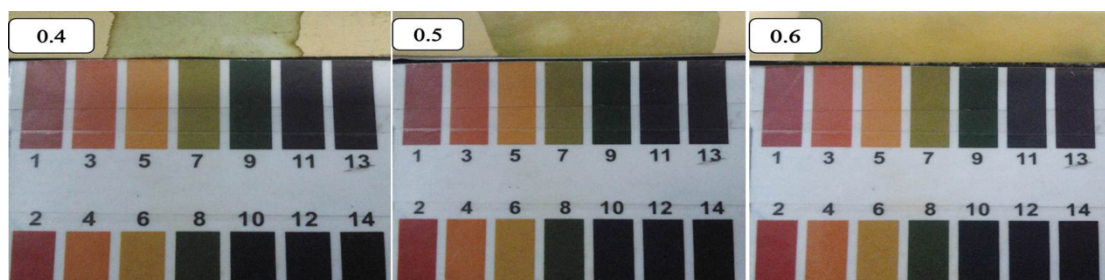

**Fig. S3** The pH values of the three reactive systems monitored using the pH test papers. 0.4, 0.5 and 0.6 are the feed ratio of DCA to glucose units of mPEG-St

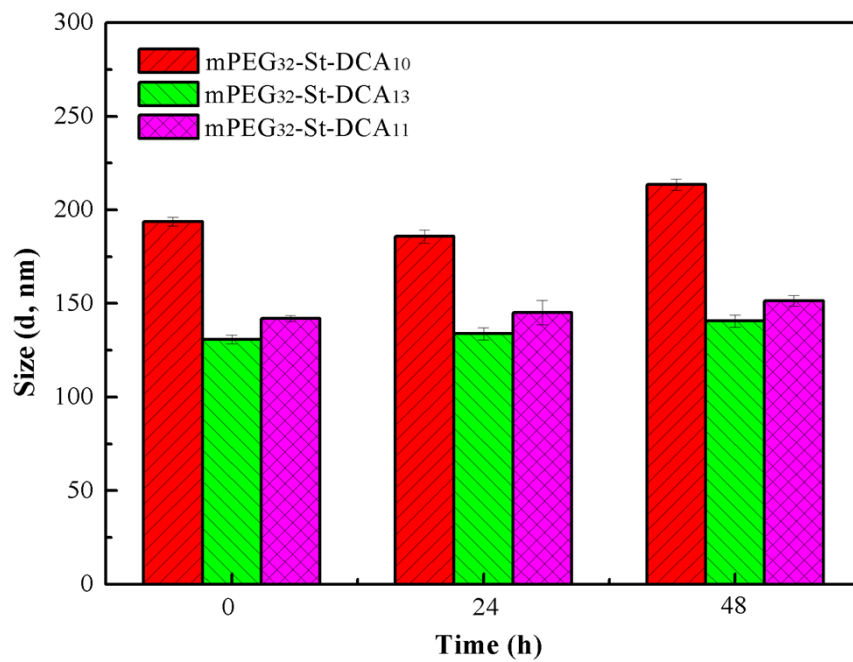

**Fig. S4** Stability of mPEG-St-DCA micelles in PBS solution (pH 7.4) at 25 °C for 48 h by DLS.

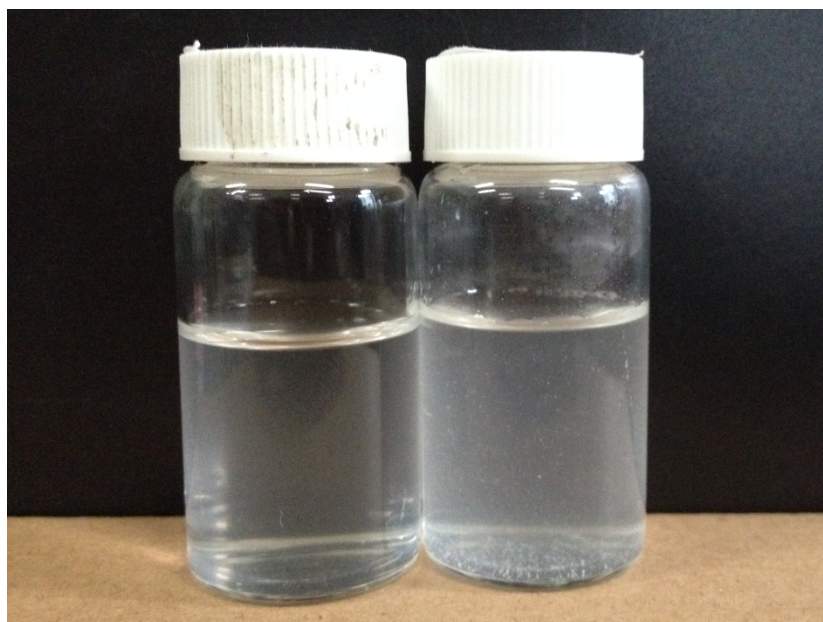

**Fig. S5** A photograph of mPEG<sub>32</sub>-St-DCA<sub>13</sub> micelles incubated with the PBS solution of pH 7.4 (left vial) and pH 5.5 (right vial) for 2 h at 37 °C.

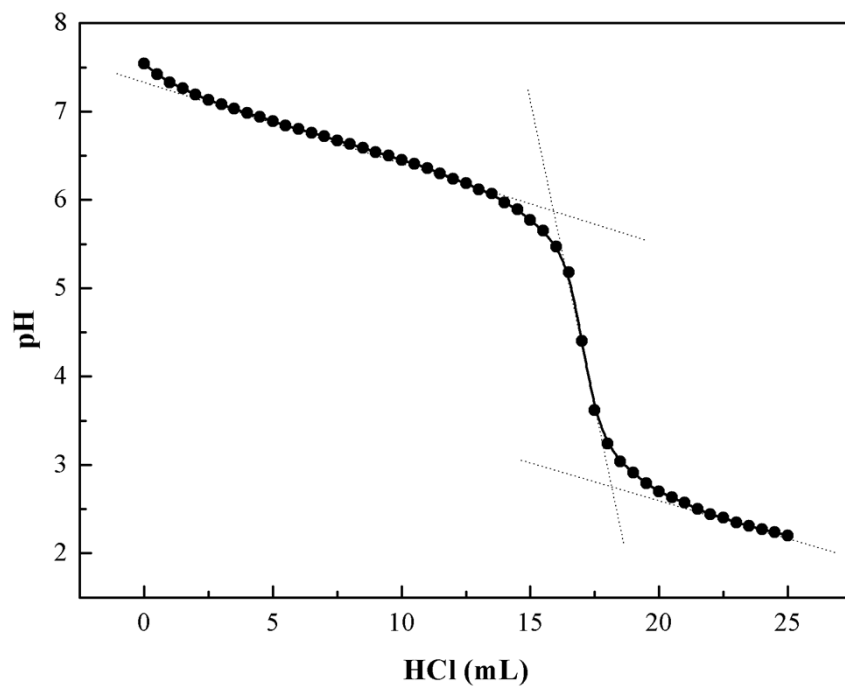

**Fig. S6** The pH as a function of the volume of HCl (0.1 M) added in 10 mL mPEG<sub>32</sub>-St-DCA<sub>13</sub> micelles solution (0.5 mg/mL)

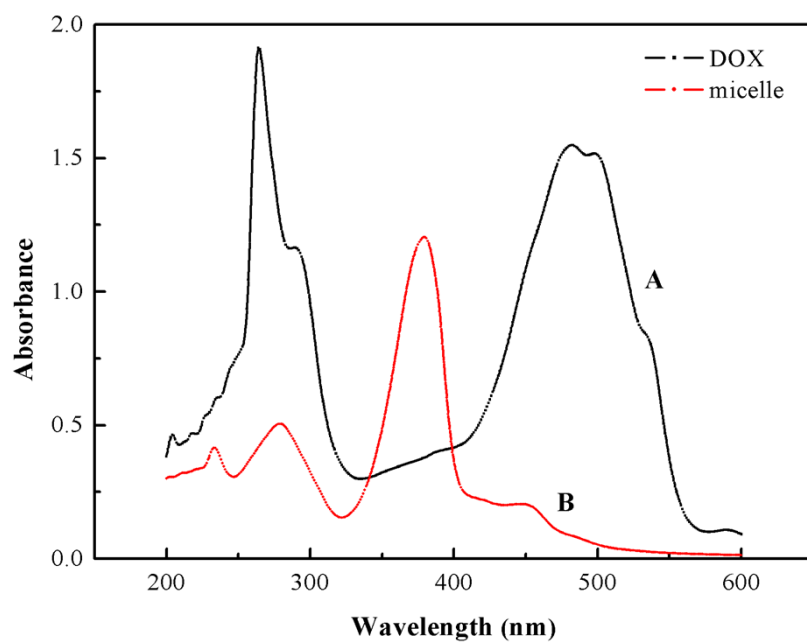

**Fig. S7** The UV scanning spectra of (A) DOX·HCl and (B) mPEG-St-DCA micelles in DMSO
